# Supplementary material
Source: publisher site journal article supplement (https://www.dovepress.com/article/278981)
Supplement: Supplementary file 1 [file get_supplementary_file.php]

**Characteristics Associated with Accelerated Lung Function Decline in a Primary Care Population with Chronic Obstructive Pulmonary Disease**

**Supplementary material**

Contents

[**Definition of Baseline Variables** 2](#_Toc54365210)

[**Figure E1:** Total number of spirometry measurements identified over patient follow-up 3](#_Toc54365211)

[**Table E1:** Univariate associations between baseline characteristics and accelerated FEV1 and FVC decline 4](#_Toc54365212)

[**Table E2**: Baseline characteristics associated with accelerated lung function decline defined using median rate of decline. Numbers are adjusted OR (95% CI). 6](#_Toc54365213)

[**Table E3**: Baseline characteristics associated with accelerated lung function decline defined using -40ml/year. Numbers are adjusted OR (95% CI). 7](#_Toc54365214)

[**Table E4**: Baseline characteristics of patients included in sensitivity cohorts. Numbers are n(%) or median(IQR). 8](#_Toc54365215)

[**Table E5**: Baseline characteristics associated with accelerated decline in sensitivity cohorts defined using the fastest quartile of decline. Numbers are adjusted OR (95% CI). 9](#_Toc54365216)

[**Table E6**: Baseline characteristics associated with accelerated decline in sensitivity cohorts defined using median decline. Numbers are adjusted OR (95% CI). 10](#_Toc54365217)

[**Figure E2**: Summary of significant associations between baseline characteristics and lung functiondecline 11](#_Toc54365218)

# **Definition of Baseline Variables**

Exposures included baseline patient characteristics such as patient demographics, symptoms, comorbidities, COPD severity, and COPD medication. Patient demographics included age at start of follow-up, gender, ethnicity, and socioeconomic status through the Index of Multiple Deprivation (IMD) where 1 was the most deprived and 5 was the least deprived. Smoking status (current or ex) was defined as the closest smoking status recorded to the start of follow-up.

Symptoms included self-reported breathlessness, chronic cough, and sputum production in a 3 year period prior to the start of follow-up.

History of comorbidities included myocardial infarction (MI), ischaemic stroke, lung cancer, and bronchiectasis which were defined as ever having the event. Heart failure (HF), Gastro-oesophageal reflux disease (GORD), anxiety, and depression were defined as having an even recorded 3 years prior to the start of follow-up. History of asthma was defined as having asthma recoded any time prior to 2 years before start of follow-up. BMI was defined using the closest height and weight to start of follow-up within a 5 year period (3 years prior and 2 year after start of follow-up) and categorised as normal weight (18.5-25kg/m2), underweight (<18.5kg/m2), overweight (25-30kg/m2), and obese (≥30kg/m2).

COPD severity included MRC dyspnoea score which was defined as the closest MRC to the start of follow-up within a 5 year period (3 years prior and 2 years after the start of follow-up). Airflow obstruction was defined using patients’ first FEV1 measurement and height to calculate FEV1 percent predicted at categorised as mild (≥80% predicted), moderate (50-80% predicted), severe (30-50% predicted), and very severe(<30% predicted). This was calculated using standard equations(15). COPD exacerbation frequency in the first year of follow-up was defined using GP and hospital treated exacerbations and was categorised as none, 1, 2, or ≥3. COPD medications in the year prior to the start of follow-up were identified. COPD medications included none, any ICS-containing medications, LABA and LAMA monotherapy or their combination, and SABA and SAMA monotherapy or their combination.

# **Figure E1:** Total number of spirometry measurements identified over patient follow-up

# **Table E1:** Univariate associations between baseline characteristics and accelerated FEV1 and FVC decline

|  | **Odds of accelerated FEV1 decline (OR 95% CI) N=30,609** | **P value** | **Test for trend** | **Odds of accelerated FVC decline  (OR 95% CI) N=28,021** | | **P value** | | **Test for trend** | |
| --- | --- | --- | --- | --- | --- | --- | --- | --- | --- |
| **Age** | 1.00 (1.00-1.00) | <0.001 |  | 1.00 (1.00-1.01) | <0.001 | |  | |
| **Gender (Males)** | 0.81 (0.75-0.86) | <0.001 |  | 1.52(1.46-1.58) | <0.001 | |  | |
| **Current smoking** | 1.15 (1.08-1.23) | <0.001 |  | 1.07 (1.03-1.12) | 0.001 | |  | |
| **IMD**  1 (most deprived)  2  3  4  5 (least deprived) | Ref 1.01 (0.91-1.13) 1.06 (0.96-1.18) 1.05 (0.94-1.17) 1.22 (1.10-1.35) | Ref 0.791 0.249 0.328 <0.001 | <0.001 | Ref 0.97 (0.91-1.04) 0.95 (0.88-1.01) 0.97 (0.90-1.03) 1.00 (0.93-1.07) | Ref 0.435 0.116 0.325 0.888 | | 0.05 | |
| **Breathlessness** | 1.31 (1.19-1.43) | <0.001 |  | 1.04 (1.00-1.08) | 0.086 | |  | |
| **Cough** | 1.13 (1.06-1.21) | <0.001 |  | 0.94 (0.90-0.98) | 0.002 | |  | |
| **Sputum** | 1.20 (1.06-1.35) | 0.004 |  | 1.13 (1.06-1.20) | <0.001 | |  | |
| **Asthma** | 1.00 (0.93-1.07) | 0.972 |  | 0.92 (0.88-0.95) | <0.001 | |  | |
| **MI** | 0.94 (0.84-1.06) | 0.317 |  | 1.17 (1.09-1.27) | <0.001 | |  | |
| **Stroke** | 1.13 (0.97-1.31) | 0.111 |  | 1.19 (1.07-1.32) | 0.001 | |  | |
| **HF** | 0.93 (0.81-1.05) | 0.237 |  | 1.29 (1.19-1.39) | <0.001 | |  | |
| **Lung cancer** | 1.22 (0.80-1.87) | 0.361 |  | 1.13 (0.85-1.51) | 0.387 | |  | |
| **Bronchiectasis** | 0.97 (0.80-1.19) | 0.792 |  | 1.02 (0.90-1.15) | 0.754 | |  | |
| **GORD** | 0.98 (0.86-1.11) | 0.715 |  | 0.96 (0.87-1.05) | 0.345 | |  | |
| **Anxiety** | 1.00 (0.89-1.13) | 0.979 |  | 1.11 (1.03-1.19) | 0.008 | |  | |
| **Depression** | 1.10 (0.99-1.23) | 0.077 |  | 1.09 (1.02-1.18) | 0.018 | |  | |
| **BMI**  Normal  Underweight   Overweight  Obese | Ref 1.19 (1.01-1.40) 0.84 (0.78-0.90) 0.85 (0.78-0.91) | Ref 0.043 <0.001 <0.001 | <0.001 | Ref 1.22 (1.01-1.35) 0.87 (0.83-0.92) 0.81 (0.77-0.85) | Ref <0.001 <0.001 <0.001 | | <0.001 | |
| **mMRC**  0  1  2  3  4 | Ref 1.04 (0.96-1.12) 1.21 (1.11-1.32) 1.28 (1.14-1.43) 1.26 (0.98-1.61) | Ref 0.374 <0.001 <0.001 0.067 | 0.009 | Ref 0.91 (0.85-0.98) 1.05 (0.98-1.14) 1.08 (0.99-1.19) 1.37 1.14-1.65) | Ref 0.010 0.164 0.093 0.001 | | <0.001 | |
| **Airflow obstruction**  Mild  Moderate  Severe  Very severe | Ref 0.72 (0.66-0.80) 0.93 (0.79-1.10) 0.70 (0.51-0.97) | Ref <0.001 0.396 0.034 | 0.121 | Ref 0.72 (0.69-0.76) 0.68 (0.64-0.72) 0.65 (0.59-0.72) | Ref <0.001 <0.001 <0.001 | | <0.001 | |
| **AECOPD frequency**  0  1 moderate, 0 severe  2 moderate, 0 severe  ≥3 moderate, 0 severe   1 severe, any moderate  ≥2 severe, any moderate | Ref  1.05 (0.97-1.13)  1.11 (1.01-1.21)  1.23 (1.13-1.35)  1.19 (1.01-1.41)  1.20 (0.84-1.74) | Ref  0.227  0.034  <0.001  0.033  0.317 | 0.140 | Ref  0.95 (0.90-1.00)  0.92 (0.86-0.98)  1.02 (0.96-1.08)  1.19 (1.08-1.32)  1.76 (1.47-2.12) | Ref  0.048  0.011  0.483  <0.001  <0.001 | | <0.001 | |
| **ICS-combination therapy** | 1.13 (1.07-1.21) | <0.001 |  | 0.97 (0.93-1.01) | 0.111 | |  | |

# **Table E2**: Baseline characteristics associated with accelerated lung function decline defined using median rate of decline. Numbers are adjusted OR (95% CI).

|  | **Odds of having fast FEV1 decline OR (95% CI) N=30,609** | **P value** | **Odds of having fast FVC decline  OR (95% CI) N=28,021** | **P value** |
| --- | --- | --- | --- | --- |
| **Age** | 1.01 (1.01 – 1.01) | <0.001 | 1.02 (1.02 – 1.03) | <0.001 |
| **Gender** (Males) | 0.88 (0.82 – 0.95) | 0.001 | 0.49 (0.46 – 0.53) | <0.001 |
| **Current smoking** | 1.17 (1.10 – 1.23) | <0.001 | 0.99 (0.93 – 1.05) | 0.626 |
| **IMD**  1 (most deprived)  2  3  4  5 (least deprived) | Ref 1.05 (0.95 – 1.15) 1.03 (0.94 – 1.13) 1.00 (0.91 – 1.09) 1.15 (1.06 – 1.26) | Ref 0.334 0.534 0.975 0.001 | Ref 1.02 (0.93 – 1.13) 1.01 (0.92 – 1.11) 0.97 (0.87 – 1.07) 1.16 (1.06 – 1.28) | Ref 0.632 0.778 0.563 0.001 |
| **Breathlessness** | 1.10 (1.02 – 1.19) | 0.019 | 0.96 (0.90 – 1.02) | 0.151 |
| **Cough** | 1.10 (1.03 – 1.17) | 0.006 | 0.95 (0.90 – 1.01) | 0.090 |
| **Sputum** | 1.01 (0.90 – 1.13) | 0.892 | 1.13 (1.04 – 1.23) | 0.006 |
| **Asthma** | 0.93 (0.87 – 0.99) | 0.037 | 1.03 (0.97 – 1.10) | 0.371 |
| **MI** | 1.03 (0.93 – 1.13) | 0.566 | 1.09 (0.98 – 1.22) | 0.102 |
| **Stroke** | 1.07 (0.94 – 1.21) | 0.313 | 1.08 (0.94 – 1.25) | 0.276 |
| **HF** | 1.00 (0.89 – 1.11) | 0.926 | 1.08 (0.96 – 1.22) | 0.183 |
| **Lung cancer** | 1.05 (0.74 – 1.50) | 0.785 | 1.22 (0.82 – 1.81) | 0.320 |
| **Bronchiectasis** | 1.01 (0.85 – 1.19) | 0.928 | 1.07 (0.90 – 1.27) | 0.454 |
| **GORD** | 0.98 (0.87 – 1.10) | 0.669 | 0.92 (0.81 – 1.04) | 0.170 |
| **Anxiety** | 1.04 (0.93 – 1.15) | 0.524 | 1.18 (1.005 – 1.32) | 0.004 |
| **Depression** | 1.02 (0.92 – 1.23) | 0.705 | 1.10 (0.99 – 1.23) | 0.088 |
| **BMI**  Normal  Underweight   Overweight  Obese | Ref 1.20 (1.05 – 1.38) 0.87 (0.82 – 0.93) 0.84 (0.78 – 0.90) | Ref 0.009  <0.001 <0.001 | Ref 1.28 (1.11 – 1.47) 0.93 (0.87 – 0.99) 0.92 (0.86 – 0.99) | Ref 0.001 0.028 0.020 |
| **mMRC**  0  1  2  3  4 | Ref 1.03 (1.05 – 1.38) 1.07 (0.99 – 1.16) 1.10 (0.99 – 1.21) 0.97 (0.80 – 1.18) | Ref 0.412 0.077 0.056 0.791 | Ref 1.01 (0.94 – 1.09) 1.12 (1.03 – 1.22) 1.17 (1.06 – 1.30) 1.00 (0.79 – 1.25) | Ref 0.778 0.006 0.003 0.973 |
| **Airflow obstruction**   Mild  Moderate  Severe  Very severe | Ref 0.55 (0.51 – 0.61) 0.51 (0.44 – 0.58) 0.41 (0.32 – 0.51) | Ref <0.001 <0.001 <0.001 | Ref 0.92 (0.86 – 0.98) 1.05 (0.96 – 1.15) 1.36 (0.16 – 1.60) | Ref 0.012 0.277 <0.001 |
| **AECOPD frequency**  0  1 moderate, no severe  2 moderate, no severe  ≥3 moderate, no severe  1 severe, any moderate  ≥2 severe, any moderate | Ref 1.02 (0.96 – 1.09) 1.02 (0.94 – 1.11) 1.08 (1.00 – 1.17) 0.94 (0.83 – 1.08) 1.08 (0.82 – 1.00) | Ref 0.483 0.622 0.057 0.405 0.580 | Ref 0.99 (0.92 – 1.06) 0.96 (0.88 – 1.04) 1.07 (0.99 – 1.16) 1.19 (1.03 – 1.37) 1.08 (0.80 – 1.45) | Ref 0.719 0.331 0.109 0.016 0.613 |
| **COPD medication**   Non-ICS combinations  ICS combinations | Ref 1.07 (1.01 – 1.13) | Ref 0.019 | Ref 1.07 (1.01 – 1.14) | Ref 0.027 |

# **Table E3**: Baseline characteristics associated with accelerated lung function decline defined using -40ml/year. Numbers are adjusted OR (95% CI).

|  | **Odds of having fast FEV1 decline  OR (95%)  N=30,609** | **P value** | **Odds of having fast FVC decline  Or (95%CI) N=28,021** | **P value** |
| --- | --- | --- | --- | --- |
| **Age** | 1.01 (1.00 – 1.01) | 0.010 | 1.01 (1.01 – 1.02) | <0.001 |
| **Gender** (Males) | 0.90 (0.80 – 1.00) | 0.052 | 0.68 (0.62 – 0.74) | <0.001 |
| **Current smoking** | 1.18 (1.09 – 1.28) | <0.001 | 1.03 (0.96 – 1.10) | 0.436 |
| **Index Multiple deprivation**  1 (most deprived)  2  3  4  5 (least deprived) | Ref 1.02 (0.89 – 1.15) 1.04 (0.92 – 1.19) 0.97 (0.86 – 1.10) 1.17 (1.03 – 1.32) | Ref 0.812 0.494 0.677 0.013 | Ref 1.05 (0.94 – 1.17) 1.10 (0.98 – 1.23) 1.10 (0.99 – 1.23) 0.33 (1.20 – 1.48) | Ref 0.425 0.091 0.073 <0.001 |
| **Breathlessness** | 1.39 (1.25 – 1.55) | <0.001 | 1.01 (0.94 – 1.08) | 0.876 |
| **Cough** | 1.08 (0.99 – 1.18) | 0.101 | 0.95 (0.88 – 1.01) | 0.106 |
| **Sputum** | 1.03 (0.88 – 1.21) | 0.674 | 1.11 (1.01 – 1.23) | 0.030 |
| **Asthma** | 0.93 (0.85 – 1.02) | 0.105 | 1.09 (1.01 – 1.17) | 0.032 |
| **MI** | 0.87 (0.76 – 1.00) | 0.058 | 1.05 (0.93 – 1.19) | 0.422 |
| **Stroke** | 1.16 (0.97 – 1.38) | 0.103 | 0.95 (0.80 – 1.14) | 0.582 |
| **HF** | 0.87 (0.74 – 1.02) | 0.088 | 1.05 (0.91 – 1.21) | 0.515 |
| **Lung cancer** | 1.36 (0.84 – 2.21) | 0.212 | 0.57 (0.33 – 0.97) | 0.032 |
| **Bronchiectasis** | 0.87 (0.69 – 1.11) | 0.263 | 1.10 (0.90 – 1.34) | 0.352 |
| **GORD** | 1.04 (0.89 – 1.21) | 0.612 | 1.04 (0.90 – 1.19) | 0.612 |
| **Anxiety** | 0.91 (0.79 – 1.05) | 0.211 | 1.11 (0.97 – 1.26) | 0.128 |
| **Depression** | 1.05 (0.92 – 1.20) | 0.446 | 1.11 (0.98 – 1.26) | 0.102 |
| **BMI**  Normal  Underweight   Overweight  Obese | Ref 1.31(1.08 – 1.58) 0.87 (0.80 – 0.94) 0.79 (0.72 – 0.87) | Ref 0.006 0.001 <0.001 | Ref 1.30 (1.10 – 1.53) 0.91 (0.85 – 0.99) 0.85 (0.78 – 0.92) | Ref 0.002 0.020 <0.001 |
| **mMRC**  0  1  2  3  4 | Ref 1.06 (0.96 – 1.16) 1.25 (1.12 – 1.39) 1.29 (1.12 – 1.48) 1.18 (0.87 – 1.60) | Ref 0.235 <0.001 <0.001 0.282 | Ref 1.06 (0.97 – 1.15) 1.23 (1.12 – 1.36) 1.17 (1.03 – 1.32) 1.26 (0.96 – 1.66) | Ref 0.184 <0.001 0.015 0.101 |
| **Airflow obstruction**   Mild  Moderate  Severe  Very severe | Ref 0.71 (0.64 – 0.80) 0.82 (0.67 – 0.99) 0.57 (0.38 – 0.86) | Ref <0.001 0.043 0.008 | Ref 1.00 (0.92 – 1.07) 1.29 (1.17 – 1.43) 1.86 (1.53 – 2.25) | Ref 0.900 <0.001 <0.001 |
| **AECOPD frequency**  0  1 moderate, no severe  2 moderate, no severe  ≥3 moderate, no severe  1 severe, any moderate  ≥2 severe, any moderate | Ref 1.06 (0.97 – 1.17) 1.13 (1.01 – 1.26) 1.26 (1.13 – 1.40) 1.22 (1.01 – 1.48) 1.20 (0.78 – 1.86) | Ref 0.178 0.038 <0.001 0.043 0.407 | Ref 1.06 (0.98 – 1.15) 1.05 (0.95 – 1.16) 1.22 (1.10 – 1.34) 1.30 (1.10 – 1.53) 1.49 (1.06 – 2.11) | Ref 0.131 0.387 <0.001 0.002 0.023 |
| **COPD medication**   Non-ICS combinations  ICS-combinations | Ref 1.17 (1.08 – 1.26) | Ref <0.001 | Ref 1.05 (0.98 – 1.13) | Ref 0.192 |

# **Table E4**: Baseline characteristics of patients included in sensitivity cohorts. Numbers are n(%) or median(IQR).

|  | **FEV1 sensitivity cohort  N=50,308** | **FVC sensitivity cohort  N=** |
| --- | --- | --- |
| **Age** | 67.7 (59.9 to 75.1) | 67.0 (60.0 to 75.0) |
| **Gender**  (Males) | 26,944 (53.6) | 19,569 (53.7) |
| **Current smoking** | 30,267 (60.2) | 21,871 (60.0) |
| **IMD**  1 (most deprived)  2  3  4  5 (least deprived) | 7,759 (15.4) 9,688 (19.3) 9,982 (19.9) 10,871 (21.6) 11,978 (23.8) | 5,387 (14.8) 6,905 (18.9) 7,251 (19.9) 8,159 (22.4) 8,752 (24.0) |
| **Breathlessness** | 8,069 (16.0) | 12,146 (33.3) |
| **Cough** | 17,099 (34.0) | 20,810 (57.5) |
| **Sputum** | 3,469 (6.9) | 4,631 (12.7) |
| **Asthma** | 14,693 (29.2) | 13,368 (36.7) |
| **MI** | 3,614 (7.2) | 2,576 (7.1) |
| **Stroke** | 1,951 (3.9) | 1,298 (3.6) |
| **HF** | 3,240 (6.4) | 2,276 (6.2) |
| **Lung cancer** | 256 (0.5) | 179 (0.5) |
| **Bronchiectasis** | 1,316 (2.6) | 1,022 (2.8) |
| **GORD** | 2,661 (5.3) | 2,027 (5.6) |
| **Anxiety** | 3,604 (7.2) | 2,693 (7.4) |
| **Depression** | 4,019 (8.0) | 2,916 (8.0) |
| **BMI**  Normal  Underweight   Overweight  Obese | 14,203 (35.6) 1,617 (4.1) 13,953 (35.0) 10,146 (25.4) | 11,236 (33.1) 1,318 (3.9) 11,730 (34.6) 9,619 (28.4) |
| **mMRC**  0  1  2  3  4 | 6,040 (22.0) 11,281 (41.1) 6,478 (23.6) 3,101 (11.3) 564 (2.1) | 4,728 (21.6) 9,117 (41.7) 5,187 (23.7) 2,459 (11.3) 371 (1.7) |
| **Airflow obstruction**   Mild  Moderate  Severe  Very severe | 15,356 (30.8) 23,465 (47.1) 9,363 (18.8) 1,657 (3.3) | 10,800 (29.8) 17,389 (48.0) 6,863 (18.9) 1,216 (3.4) |
| **AECOPD frequency**  0  1 moderate, no severe  2 moderate, no severe  ≥3 moderate, no severe  1 severe, any moderate  ≥2 severe, any moderate | 21,583 (42.9) 12,232 (24.3) 6,482 (12.9) 7,509 (14.9) 2,011 (4.0) 491 (1.0) | 14,730 (40.4) 9,088 (24.9) 4,991 (13.7) 5,957 (16.3) 1,400 (3.8) 309 (0.9) |
| **COPD medication**   Non-ICS combinations   ICS combinations | 24,326 (48.4) 25,982 (51.7) | 16.552 (45.4) 19,923 (54.6) |

# **Table E5**: Baseline characteristics associated with accelerated decline in sensitivity cohorts defined using the fastest quartile of decline. Numbers are adjusted OR (95% CI).

|  | **FEV1 OR (95% CI)** | **P value** | **FVC OR (95% CI)** | **P value** |
| --- | --- | --- | --- | --- |
| **Age** | 1.01 (1.00 – 1.01) | <0.001 | 1.03 (1.02 – 1.03) | <0.001 |
| **Gender** (Males) | 1.07 (0.96 – 1.19) | 0.216 | 0.55 (0.51 – 0.60) | <0.001 |
| **Current smoking** | 1.27 (1.17 – 1.37) | <0.001 | 1.05 (0.99 – 1.11) | 0.139 |
| **IMD**  1 (most deprived)  2  3  4  5 (least deprived) | Ref 1.05 (0.93 – 1.19) 1.06 (0.94 – 1.20) 1.13 (1.00 – 1.27) 1.26 (1.12 – 1.42) | Ref 0.392 0.339 0.048 <0.001 | Ref 1.05 (0.95 – 1.15) 0.97 (0.88 – 1.06) 1.00 (0.91 – 1.10) 1.14 (1.04 – 1.26) | Ref 0.411 0.473 0.973 0.005 |
| **Breathlessness** | 1.13 (1.01 – 1.26) | 0.028 | 1.05 (0.99 – 1.12) | 0.094 |
| **Cough** | 0.95 (0.87 – 1.04) | 0.295 | 0.91 (0.86 – 0.97) | 0.002 |
| **Sputum** | 1.08 (0.92 – 1.26) | 0.361 | 1.11 (1.02 – 1.21) | 0.016 |
| **Asthma** | 0.92 (0.84 – 1.00) | 0.059 | 1.05 (0.98 – 1.12) | 0.176 |
| **MI** | 0.98 (0.86 – 1.11) | 0.710 | 1.00 (0.89 – 1.11) | 0.925 |
| **Stroke** | 1.28 (1.08 – 1.51) | 0.004 | 1.06 (0.91 - 1.23) | 0.460 |
| **HF** | 1.10 (0.96 – 1.28) | 0.175 | 1.14 (1.01 -1.29) | 0.033 |
| **Lung cancer** | 1.19 (0.74 – 1.93) | 0.475 | 1.00 (0.68 – 1.48) | 0.997 |
| **Bronchiectasis** | 0.81 (0.64 – 1.03) | 0.081 | 1.12 (0.94 – 1.33) | 0.220 |
| **GORD** | 1.04 (0.90 – 1.21) | 0.604 | 1.02 (0.90 – 1.15) | 0.798 |
| **Anxiety** | 0.96 (0.83 – 1.11) | 0.595 | 1.06 (0.95 – 1.19) | 0.299 |
| **Depression** | 1.03 (0.90 – 1.18) | 0.634 | 1.13 (1.01 – 1.27) | 0.028 |
| **BMI**  Normal  Underweight   Overweight  Obese | Ref 1.37 (1.13 – 1.65) 0.78 (0.72 – 0.85) 0.78 (0.70 – 0.84) | Ref 0.001 <0.001 <0.001 | Ref 1.25 (1.08 – 1.46) 0.90 (0.84 – 0.96) 0.89 (0.83 – 0.96) | Ref 0.003 0.002 0.002 |
| **mMRC**  0  1  2  3  4 | Ref 1.02 (0.94 – 1.12) 1.29 (1.17 – 1.44) 1.36 (1.19 – 1.55) 1.51 (1.15 – 1.98) | Ref 0.595 <0.001 <0.001 0.003 | Ref 1.03 (0.96 – 1.11) 1.22 (1.11 – 1.32) 1.27 (1.14 – 1.42) 1.41 (1.12 – 1.77) | ref 0.419 <0.001 <0.001 0.004 |
| **Airflow obstruction**  Mild  Moderate  Severe  Very severe | Ref 0.72 (0.65 – 0.80) 0.66 (0.54 – 0.80) 0.23 (0.13 – 0.41) | Ref <0.001 <0.001 <0.001 | Ref 1.07 (1.00 – 1.15) 1.28 (1.16 – 1.40) 1.62 (1.36 – 1.94) | Ref 0.051 <0.001 <0.001 |
| **AECOPD frequency**  0  1 moderate, no severe  2 moderate, no severe  ≥3 moderate, no severe  1 severe, any moderate  ≥2 severe, any moderate | Ref 1.04 (0.95 – 1.13) 0.96 (0.85 – 1.07) 1.10 (0.98 – 1.22) 1.15 (0.95 – 1.39) 1.97 (1.35 – 2.88) | Ref 0.388 0.424 0.093 0.166 <0.001 | Ref 1.06 (0.99 – 1.14) 0.99 (0.91 – 1.08) 1.11 (1.03 – 1.21) 1.20 (1.03 – 1.40) 1.76 (1.28 – 2.42) | Ref 0.111 0.805 0.013 0.017 0.001 |
| **COPD medication**   Non-ICS combinations  ICS combinations | Ref 1.07 (0.99 – 1.16) | Ref 0.068 | Ref 1.03 (0.96 – 1.09) | Ref 0.420 |

# **Table E6**: Baseline characteristics associated with accelerated decline in sensitivity cohorts defined using median decline. Numbers are adjusted OR (95% CI).

|  | **FEV1 OR (95% CI)** | **P value** | **FVC OR (95% CI)** | **P value** |
| --- | --- | --- | --- | --- |
| **Age** | 1.01 (1.01 – 1.01) | <0.001 | 1.02 (1.02 – 1.03) | <0.001 |
| **Gender** (Males) | 1.08 (0.99 – 1.18) | 0.088 | 0.57 (0.52 – 0.62) | <0.001 |
| **Current smoking** | 1.23 (1.15 – 1.31) | <0.001 | 0.97 (0.90 – 1.04) | 0.360 |
| **IMD**  1 (most deprived)  2  3  4  5 (least deprived) | Ref 1.04 (0.94 – 1.15) 1.09 (0.98 – 1.21) 1.16 (1.05 – 1.28) 1.20 (1.09 – 1.32) | Ref 0.466 0.096 0.005 <0.001 | Ref 1.09 (0.98 – 1.22) 1.05 (0.94 – 1.17) 1.03 (0.93 – 1.15) 1.20 (1.08 – 1.34) | Ref 0.105 0.365 0.594 0.001 |
| **Breathlessness** | 1.02 (0.93 – 1.12) | 0.636 | 0.95 (0.89 – 1.02) | 0.167 |
| **Cough** | 0.95 (0.88 – 1.02) | 0.182 | 0.94 (0.88 – 1.01) | 0.091 |
| **Sputum** | 1.06 (0.93 – 1.21) | 0.398 | 1.10 (1.00 – 1.22) | 0.048 |
| **Asthma** | 0.91 (0.85 – 0.98) | 0.016 | 1.04 (0.96 – 1.12) | 0.326 |
| **MI** | 1.02 (0.92 – 1.14) | 0.668 | 1.05 (0.92 – 1.18) | 0.510 |
| **Stroke** | 1.08 (0.93 – 1.24) | 0.320 | 1.11 (0.94 – 1.32) | 0.210 |
| **HF** | 1.12 (0.99 – 1.27) | 0.072 | 1.10 (0.96 – 1.26) | 0.161 |
| **Lung cancer** | 1.30 (0.88 – 1.94) | 0.192 | 1.15 (0.74 – 1.79) | 0.543 |
| **Bronchiectasis** | 1.03 (0.85 – 1.25) | 0.745 | 1.03 (0.85 – 1.25) | 0.773 |
| **GORD** | 0.96 (0.85 – 1.10) | 0.582 | 0.91 (0.79 – 1.04) | 0.171 |
| **Anxiety** | 1.02 (0.90 – 1.15) | 0.792 | 1.12 (0.98 – 1.27) | 0.098 |
| **Depression** | 1.01 (0.90 – 1.14) | 0.827 | 1.14 (1.00 – 1.29) | 0.045 |
| **BMI**  Normal  Underweight   Overweight  Obese | Ref 1.40 (1.18 – 1.64) 0.78 (0.73 – 0.84) 0.82 (0.76 – 0.89) | Ref <0.001 <0.001 <0.001 | Ref 1.13 (0.95 – 1.33) 0.90 (0.83 – 0.97) 0.92 (0.84 – 0.99) | Ref 0.165 0.006 0.027 |
| **mMRC**  0  1  2  3  4 | Ref 1.14 (1.05 – 1.23) 1.23 (1.12 – 1.35) 1.33 (1.19 – 1.49) 1.18 (0.94 – 1.47) | Ref 0.002 <0.001 <0.001 0.147 | Ref 1.02 (0.94 – 1.11) 1.16 (1.05 – 1.28) 1.16 (1.02 – 1.31) 1.08 (0.83 – 1.41) | Ref 0.644 0.003 0.020 0.567 |
| **Airflow obstruction**   Mild  Moderate  Severe  Very severe | Ref 0.65 (0.59 – 0.71) 0.53 (0.45 – 0.62) 0.29 (0.21 – 0.39) | Ref <0.001 <0.001 <0.001 | Ref 1.02 (0.95 – 1.10) 1.27 (1.14 – 1.41) 1.67 (1.36 – 2.04) | Ref 0.597 <0.001 <0.001 |
| **AECOPD frequency**  0  1 moderate, no severe  2 moderate, no severe  ≥3 moderate, no severe  1 severe, any moderate  ≥2 severe, any moderate | Ref 1.01 (0.93 – 1.08) 0.96 (0.88 – 1.06) 0.99 (0.91 – 1.09) 1.17 (1.00 – 1.37) 1.27 (0.92 – 1.75) | Ref 0.896 0.441 0.907 0.047 0.149 | Ref 1.01 (0.93 – 1.09) 0.94 (0.85 – 1.03) 1.12 (1.02 – 1.24) 1.13 (0.95 – 1.33) 1.25 (0.87 – 1.78) | Ref 0.859 0.194 0.016 0.165 0.226 |
| **COPD medication**   Non-ICS combinations  ICS combinations | Ref 1.10 (1.03 – 1.18) | Ref 0.003 | Ref 1.04 (0.97 – 1.12) | Ref 0.271 |

# **Figure E2**: Summary of significant associations between baseline characteristics and lung functiondecline

|  | **FEV1 cohort** | | | **Sensitivity FEV1 cohort** | |  | **FVC cohort** | | **Sensitivity FVC cohort** | |
| --- | --- | --- | --- | --- | --- | --- | --- | --- | --- | --- |
| **Variables** | **Fast 1** | **Fast 2** | **Fast 3** | **Fast 1** | **Fast 2** | **Fast 1** | **Fast 2** | **Fast 1** | **Fast 2** |
| **Age** |  |  |  |  |  |  |  |  |  |
| **Male gender** |  |  |  |  |  |  |  |  |  |
| **Current smoking** |  |  |  |  |  |  |  |  |  |
| **IMD**  2  3  4  5 (least) |  |  |  |  |  |  |  |  |  |
|  |  |  |  |  |  |  |  |  |
|  |  |  |  |  |  |  |  |  |
|  |  |  |  |  |  |  |  |  |
| **Breathlessness** |  |  |  |  |  |  |  |  |  |
| **Cough** |  |  |  |  |  |  |  |  |  |
| **Sputum** |  |  |  |  |  |  |  |  |  |
| **Asthma** |  |  |  |  |  |  |  |  |  |
| **MI** |  |  |  |  |  |  |  |  |  |
| **Stroke** |  |  |  |  |  |  |  |  |  |
| **HF** |  |  |  |  |  |  |  |  |  |
| **Lung cancer** |  |  |  |  |  |  |  |  |  |
| **Bronchiectasis** |  |  |  |  |  |  |  |  |  |
| **GORD** |  |  |  |  |  |  |  |  |  |
| **Anxiety** |  |  |  |  |  |  |  |  |  |
| **Depression** |  |  |  |  |  |  |  |  |  |
| **BMI**  Underweight  Overweight  Obese |  |  |  |  |  |  |  |  |  |
|  |  |  |  |  |  |  |  |  |
|  |  |  |  |  |  |  |  |  |
| **MRC** 1  2  3  4 |  |  |  |  |  |  |  |  |  |
|  |  |  |  |  |  |  |  |  |
|  |  |  |  |  |  |  |  |  |
|  |  |  |  |  |  |  |  |  |
| **Obstruction** 2  3  4 |  |  |  |  |  |  |  |  |  |
|  |  |  |  |  |  |  |  |  |
|  |  |  |  |  |  |  |  |  |
| **AECOPD** 1 mod  2 mod  3+ mod  1 severe  2+ severe |  |  |  |  |  |  |  |  |  |
|  |  |  |  |  |  |  |  |  |
|  |  |  |  |  |  |  |  |  |
|  |  |  |  |  |  |  |  |  |
|  |  |  |  |  |  |  |  |  |
| **Meds ICS** |  |  |  |  |  |  |  |  |  |

Note: “Fast 1”: Analysis using fastest quartile of decline as cut off; “Fast 2”: Analysis using median decline as cut off; “Fast 3”: Analysis using -40ml/year as cut off. Shaded squares indicate significant associations.
